# Supplementary material
Source: MDPI journal article supplement (https://www.mdpi.com/2079-9276/3/3/575)
Supplement: s1 [file s1]

Supplementary Information

Table S1. Evaluation criteria and scoring scales for the selection of product/technologies/ services with high resource efficiency potential.

| **No.** | **Criteria to Evaluate Product Group** | **Scoring Scale** | | |
| --- | --- | --- | --- | --- |
| **1** | **Observation environment** | 1 = Living space; | | 4 = Shop |
| 2 = Working space | | 5 = Region |
| 3 = Hotel/Restaurant | | 6 = other |
| **2** | **Key parameter of observation** | 1 = Energy | | 4 = Money |
| 2 = Water | | 5 = Time |
| 3 = Waste | | 6 = other |
| **3** | **Possible to investigate in Living Labs?** | 1 = yes | | 0 = no |
|  | **Environmental sustainability aspects (based on Rohn *et al.* 2009 [28])** | | | |
| **4** | **Resource inputs/quantity,** e.g.,   - Product/infrastructure requiring high resource inputs - Mass application - Rebound effects | 0 = none | | 3 = high |
| 1 = low | | 4 = very high |
| 2 = medium | |  |
| **5** | **Resource efficiency potential**, regarding e.g.,   - Abiotic resources, biotic resources - Water, Energy - Other resources | 0 = none | | 3 = high |
| 1 = low | | 4 = very high |
| 2 = medium | |  |
|  | **Economic sustainability aspects** |  | | |
| **6** | **Feasibility,** e.g.,   - Technical feasibility - Technical know-how available in Germany - Economic viability - Market and societal acceptance | 0 = none | 3 = high | |
| 1 = low | 4 = very high | |
| 2 = medium |  | |
|  | | |
|  | | |
| **7** | **Economic importance,** e.g.,   - Market potential - Level of innovation - Relevance for export - International importance - Dependence on finite natural resources | 0 = none | 3 = high | |
| 1 = low | 4 = very high | |
| 2 = medium |  | |
|  | **Social sustainability aspects** |  | | |
| **8** | **Improving or maintaining health and quality of life**, e.g.,   - Maintaining societal status - Active participation in society | 0 = none | 3 = high | |
| 1 = low | 4 = very high | |
| 2 = medium |  | |
| **9** | **Social relevance**, e.g.,   - Job security and social security - Improving and maintaining equal opportunities - Participation opportunities - Adherence to social standards along the value chain (e.g., ILO standards) | 0 = none | 3 = high | |
| 1 = low | 4 = very high | |
| 2 = medium |  | |

Table S2. List of identified Living Labs in Germany and neighbouring countries (Status: April 2012).

| **No.** | **Living Lab** | **Research Field** | **Homepage** |
| --- | --- | --- | --- |
| **Ambient Assisted Living** | | | |
| **1** | Advanced Construction and Building Technology, Munich | Assistance systems for the demographic change | http://partner.vde.com/bmbf-aal/aal-steckbriefe/documents/advanced%20construction%20and%20building%20technology%20%28acbt%29.pdf |
| **2** | Ambient Assistance for Parameters of LIFE, Lüneburg | Assistance systems enabling an independent life for elderly people | http://www.vde.com/de/technik/aal/steckbriefe/seiten/projektambientassistanceforparametersoflife.aspx |
| **3** | Ambient Assisted Living, Sozialwerk St Georg, Gelsenkichen | Technical aids for personal freedom and autonomy for people with need of assistance due to disabilities, illness, social problems and old age | http://www.ambient-assisted-living.org |
| **4** | Fraunhofer IESE, Ambient Assisted Living Environment, Kaiserslautern | Technology concepts for better designed and connected life at old age | http://www.openlivinglabs.eu/livinglab/ambient-assisted-living-environment |
| **5** | Ambient Innovation Robotics, Munich | Socio-technical solutions for demographic change | http://www.airtum.de |
| **6** | Assisted Living, Kaiserslautern | Suitable, subtle, invisible and easily usable house automation technology to support aging people | http://www.ami-kl.de/frame.html?de_inhalte |
| **7** | Bremen Ambient Assisted Living Lab, Bremen | Better living for old or physically disabled people | http://baall.informatik.uni-bremen.de/en/index.php/Main_Page |
| **8** | Forschungsinstitut Technologie und Behinderung (FTB)—AAL, Wetter/Ruhr | Assistance systems for aging people | http://ftb-esv.de/wohnung3.html |
| **9** | FZI Living Lab Ambient Assisted Living, Karlsruhe | Technologies and service concepts for an independent life at old age | http://aal.fzi.de |
| **10** | Technologie-Zentr. Informatik und Informationstechnik, Bremen | Research area:  Ambient-Assisted-Living | http://www.tzi.de |
| **11** | Assisted Living in Kaiserslautern | Assistance systems for aging people | http://www.assistedliving.de |
| **12** | LivingLab Schwechat (Austria) | Assistance systems for aging people | http://www.ceit.at |
| **13** | Living Tomorrow, Vilvoorde (Belgium) | Experimental space for new living concepts (*i.e.*, mixing of functions), adapted to elderly’s needs | http://livingtomorrow.com/en/home |
| **69** | SRG Senior Research Group, TU Berlin | Better user-friendliness of technology for the elderly | http://www.srg-berlin.de |

**Table S2.** *Cont.*

| **No.** | **Living Lab** | **Research Field** | **Homepage** |
| --- | --- | --- | --- |
| **Smart Home and other Building-Related Activities** | | | |
| **14** | CIBEK, Limburgerhof | Intelligent products for residential and other purpose buildings | http://www.cibek.de |
| **15** | Connected Living, Berlin | Showroom for “connected” living | http://www.connected-living.org |
| **16** | Distributed Artificial Intelligence Living Lab, Berlin | 5 topics—health, living, cloud computing, security and network infrastructure | http://www.dai-labor.de |
| **17** | Fraunhofer-inHaus-Zentrum, Duisburg | Development of new solution for rooms and buildings | http://www.inhaus.fraunhofer.de |
| **18** | Future Care Lab, RWTH Aachen | Health Care | http://www.openlivinglabs.eu/livinglab/future-care-lab |
| **19** | iHomeLab Luzern (Swizzerland) | Smarter Living | http://ihomelab.ch/index.php?id=20 |
| **20** | Philips Home Lab Eindhoven (Netherlands) | Intelligent technologies | http://www.noldus.com/default/philips-homelab |
| **21** | Smart Environments, Berlin | Care applications in various settings | http://www.fokus.fraunhofer.de/de/fokus/index.html |
| **22** | SmartHome der Universität Bundeswehr München | Energy efficiency in households | http://smarthome.unibw-muenchen.de |
| **23** | SmartHome Paderborn e.V. | Connected, intelligent living | http://www.smarthomepaderborn.de |
| **24** | Haus der Gegenwart, München | Smart environments, e.g., in the office, car and home sectors, as well as personal living and working spaces | http://www.allmannsattlerwappner.de/#/de/projekte/detail/76/ |
| **25** | Futurelife Haus, Hünenberg (Swizzerland) | Development and research of connected smart sensor- and measurement systems to increase energy efficiency, living quality/comfort and security in residential and commercial buildings | http://www.haus.de/PH2D/ph2d.htm?snr=6850 |
| **26** | e-Wohnen der Zukunft—Projekt 4, Berlin | Products and services for the intelligent and connected home | http://www.e-wohnen-der-zukunft.de |
| **27** | Intelligentes Haus IQ150 der FU Berlin | Experimental residential building | http://intellihaus.mi.fu-berlin.de/pmwiki/pmwiki.php |
| **28** | Demonstrations-Wohnung  in Berlin | Experimental residential building | http://w ww.telematicspro.de |
| **29** | Das Mediale Haus, Nürnberg | show room, energy-efficient living incl. mobility | http://www.das-mediale-haus.de |
| **30** | Smarter Wohnen in Hattingen | Prototype of an “intelligent house” of the future | http://www.ims.fraunhofer.de/news/detailansicht/article/smarterwohnen-nrw.html |
| **31** | T-Com Haus, Rheinau-Linx | Energy-efficient living | http://www.weberhaus.de/fileadmin/weberhaus_de/redaktion/Downloads/haeuserheute_0205.pdf |
| **32** | Smart Home in Leipzig | Connected, intelligent living | http://www.swl.de/web/energie21smart/ Smart-Home/Smart-Home.htm |

**Table S2.** *Cont.*

| **No.** | **Living Lab** | **Research Field** | **Homepage** |
| --- | --- | --- | --- |
| **Smart Home and other Building-Related Activities** | | | |
| **33** | Adaptive Home Control, Winterthur (Swizzerland) | Connected, intelligent living | http://www.adhoco.com |
| **34** | Social Media Experience and Design Lab, Siegen | Connected living | http://www.openlivinglabs.eu/livinglab/smedl-social-media-experience-and-design-lab / http://www.wiwi.uni-siegen.de/wirtschaftsinformatik/praxlabs/ |
| **35** | In-HAM vzw, Gits (Belgium) | Connected, intelligent living | http://www.in-ham.be/index.cfm?n01=default&lang=en |
| **36** | Pilotprojekt “Wohnen mit LON” (Local Operating Network), Gütersloh | Integrated house automation for comfort, energy saving and security optimisation | http://www.mh-software.de/newsletter/200507/tab.pdf; http://www.lonmark.de |
| **56** | Energieeffizienz-haus-Plus, Berlin | Efficiency-House-Plus with  electro-mobility | http://www.bmvbs.de/DE/EffizienzhausPlus/effizienzhaus-plus_node.html |
| **57** | LivingLab ETH Zürich (Swizzerland) | Construction and sustainability in all dimensions | http://www.livinglabproject.org/partners/eth-zurich |
| **66** | Universal Home, Essen | Home-related developments in the areas of social environment, living systems, resource loops, flexibility and mobility, and economy | http://www.universalhome.de |
| **67** | Tobit intelligentes Haus, Ahaus | Showroom for connected, intelligent living | http://www.tobit.com/login/showTopicPerson.asp?ID=2068&sum=f722a2f92969f7ec68f031a0c94a2c73&LoginID=199-60001 |
| **Infrastructure** | | | |
| **37** | DFKI *et al.* Innovative Retail Laboratory (IRL), Saarbrücken | Intelligent shopping environment | http://www.innovative-retail.de |
| **38** | AIT Austrian Institute of Technology GmbH, Wien (Austria) | Innovative infrastructure solutions | http://www.ait.ac.at |
| **39** | Car2go, Ulm | Option to rent cars (Smart) in  minute-long intervals. Run by Daimler. | http://www.car2go.com/ulm/de |
| **40** | DriveNow, Munich | Option to rent cars (Mini) in  minute-long intervals. Run by BMW. | http://www.drive-now.com |
| **41** | e-mobility Stuttgart | Services to integrate electronic vehicles into vehicle fleets of all categories | http://www.elektromobilisiert.de |
| **71** | SAP Future Energy Center (Karlsruhe) | A collaborative platform that demonstrates how the future of sustainable energy generation, distribution, storage, and utilization can be supported by innovative IT. | http://global1.sap.com/corporate-en/innovation/living-labs/future-energy-center.epx |
| **74** | SAP Future Public Security Center (Darmstadt) | Create user-oriented solutions for civil protection and emergency response. | http://global1.sap.com/canada/press.epx?pressid=10492 |

**Table S2.** *Cont.*

| **No.** | **Living Lab** | **Research Field** | **Homepage** |
| --- | --- | --- | --- |
| **Infrastructure** | | | |
| **75** | Metro Future Store, Tönisvorst | Innovations for retail | http://www.future-store.org/internet/site/ts_fsi/node/mgroup_fsi/Lde/index.html |
| **Medicine** | | | |
| **42** | Hamburg Living Lab, Hamburg | Biomechanics, implant technology and dental technology | http://www.demos-deutschland.de/node/41/project/demos-idea/living-lab-hamburg |
| **43** | Peter L. Reichertz Institut für Medizinische Informatik, Hannover | Assisting medical technology | http://www.plri.de |
| **ICT (Information and Communication Technology)** | | | |
| **44** | Fraunhofer Fokus, Berlin | Future applications of ICT | http://www.fokus.fraunhofer.de |
| **45** | Fraunhofer IGD, Darmstadt | Interaction and visualisation concepts | http://www.igd.fraunhofer.de |
| **46** | Fraunhofer ISST, Dortmund | Development of standards, architectures and concepts | http://www.isst.fraunhofer.de |
| **47** | Living Lab Vorarlberg (Austria) | Construction of long-term stable, complex systems in ICT | http://www.livinglab-vorarlberg.at |
| **48** | Schweizerisches Produktivitäts-Institut AG, Bern (Swizzerland) | Supporting the direct and indirect sustainability of products by applying the Living Lab method in the development and use phase | http://www.ipch.ch |
| **49** | The Virtual Dimension Center, Fellbach | Introduction and implementation of modern ICT solutions | http://www.vdc-fellbach.de |
| **50** | ViRaL Cooperation Lab, Sankt Augustin | Network Virtual Reality, Virtual Engineering, 3D-Simulation and  3D-Visualisation + Technology transfer | http://www.fit.fraunhofer.de; http://www.cooperation-lab.de |
| **51** | DFKI Smart Factory, Kaiserslautern | network of platforms & activities to facilitate research, development, innovation and market validation of new cooperation technologies in  real-life environments | http://www.dfki.de/web/living-labs-de |
| **76** | European EPC Competence Center (EECC), Neuss | RFID technology and Electronic Product Code (EPC) research | http://www.eecc.info/index.php?article_id=106&clang=1 |
| **Food/Agriculture** | | | |
| **53** | Danone LivingLab, Haar | Danone Institute for Nutrition and Food research | http://institut-danone.de/content/start.php |
| **54** | Frascati Living Lab,  Frascati (Italy) | Intelligent systems/processes  (incl. ICT + SatCom applications)  in agriculture (viticulture) | http://www.c-rural.eu/index2.php?option=com_docman&task=doc_view&gid=98&Itemid=83 |
| **55** | C@R Living Labs | Project cluster from Frascati Living Lab (I), Cudillero Living Lab (ES), Soria Living Lab (ES) | http://www.c-rural.eu |
| **68** | Restaurant of the Future Wageningen (Netherlands) | New meals, meal preparation methods and service systems, observation of eating habits | http://www.restaurantvandetoekomst.wur.nl/UK/ |

**Table S2.** *Cont.*

| **No.** | **Living Lab** | **Research Field** | **Homepage** |
| --- | --- | --- | --- |
| **Food/Agriculture** | | | |
| **68** | Restaurant of the Future Wageningen (Netherlands) | New meals, meal preparation methods and service systems, observation of eating habits | http://www.restaurantvandetoekomst.wur.nl/UK/ |
| **Work Environment** | | | |
| **59** | Knowledge Workers Living Lab, München | Research and development to support knowledge work | http://www.openlivinglabs.eu/livinglab/knowledge-workers-living-lab/www.cetim.org |
| **61** | Fraunhofer IAO Office Innovation Center, Stuttgart | Future of office/work equipment, organisation *etc.* | http://oic.iao.fraunhofer.de |
| **62** | SmartFactory, Kaiserslautern | Intelligent factory environment | http://www.smartfactory.de |
| **63** | SustLabs Universität Duisburg-Essen | How is sustainability perceived and implemented in office work routines | http://www.uni-due.de/bena/sustlabs.shtml |
| **64** | YOUSE GmbH, Berlin | YOUSE helps research consortia, producers and developers to develop user-friendly products and services | http://www.youse.de |
| **70** | OrgLab, Duisburg/Essen | Organisational development and learning for innovative and responsible behaviour in  businesses and society | http://www.orglab.org |
| **72** | Sap Future Factory Initiative, Dresden | Foster co-innovation, research,  and development for the manufacturing industry. | http://global1.sap.com/corporate-en/innovation/living-labs/future-factory-initiative.epx |
| **73** | SAP Future Retail Center, Regensdorf | Foster research and development in retail, trade, and logistics. | http://global1.sap.com/corporate-en/innovation/living-labs/future-retail-center.epx |
| **Region** | | | |
| **52** | iRegion Karlsruhe | Internet-based and mobile technologies for regions  in the net economy | http://www.iregion.de |
| **58** | Neighborhood Lab  [Design Research Lab  UdK Berlin] | Fostering of networking to exchange knowledge *etc.* in urban environments | http://www.neighborhood-labs.org;  http://www.design-research-lab.org |
| **60** | Mobile City Bremen | Communication solutions in Bremen, esp. for SMEs | http://www.technologiezentren-bremen.de/de/mobilecity_mobilecity_uebersicht |
| **65** | BLISS- Better Lighting in Sustainable Streets, Kaiserslautern, Eindhoven (Netherlands), Leuven (Belgium), St. Helens (UK) | Sustainable street lighting | http://www.bliss-streetlab.eu/about_bliss/ |

© 2014 by the authors; licensee MDPI, Basel, Switzerland. This article is an open access article distributed under the terms and conditions of the Creative Commons Attribution license (http://creativecommons.org/licenses/by/3.0/).
